# Supplementary material
Source: PubMed Central journal article supplement (PMC7613002)
Supplement: EMS146519-supplement-Supplemental_material.pdf [file EMS146519-supplement-Supplemental_material.pdf]

## Supplemental Information

# Intact protein mass spectrometry reveals intraspecies variations in venom composition of a local population of *Vipera kaznakovi* in Northeastern Turkey

Daniel Petras<sup>a,b,\*^</sup>, Benjamin-Florian Hempel<sup>a,\*</sup>, Bayram Göçmen<sup>c</sup>, Mert Karis<sup>c,d</sup>, Gareth Whiteley<sup>e</sup>, Simon C. Wagstaff<sup>f</sup>, Paul Heiss<sup>a</sup>, Nicholas R. Casewell<sup>e</sup>, Ayse Nalbantsoy<sup>g,^</sup> and Roderich D. Süßmuth<sup>a,^</sup>

<sup>a</sup> Technische Universität Berlin, Institut für Chemie, Strasse des 17. Juni 124, 10623 Berlin, Germany.

<sup>b</sup> University of California San Diego, Collaborative Mass Spectrometry Innovation Center, 9500 Gilman Drive, La Jolla, California 92093, United States.

<sup>c</sup> Zoology Section, Department of Biology, Faculty of Science, Ege University, 35100 Bornova, Izmir, Turkey.

<sup>d</sup> Program of Laboratory Technology, Department of Chemistry and Chemical Process Technologies, Acıgöl Vocational School of Technical Sciences, Nevşehir Hacı Bektaş Veli University, Nevşehir, Turkey.

<sup>e</sup> Centre for Snakebite Research & Interventions, Liverpool School of Tropical Medicine, Pembroke Place, Liverpool, L3 5QA, United Kingdom

<sup>f</sup> Bioinformatics Unit, Liverpool School of Tropical Medicine, Pembroke Place, Liverpool, L3 5QA, United Kingdom

<sup>g</sup> Department of Bioengineering, Faculty of Engineering, Ege University, Bornova, 35100 Izmir, Turkey.

\* These authors contributed equally to this study

<sup>^</sup> Correspondence to [dpetras@ucsd.edu](mailto:dpetras@ucsd.edu), [analbantsoy@gmail.com](mailto:analbantsoy@gmail.com) or [roderich.suessmuth@tu-berlin.de](mailto:roderich.suessmuth@tu-berlin.de)

### Peak 1

deconvoluted by Xtract

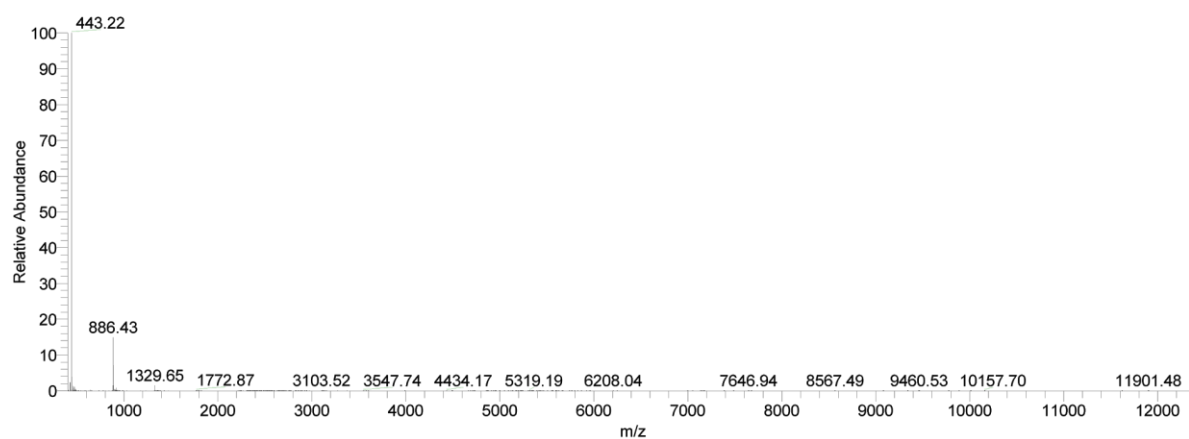

### Peak 2

deconvoluted by Xtract

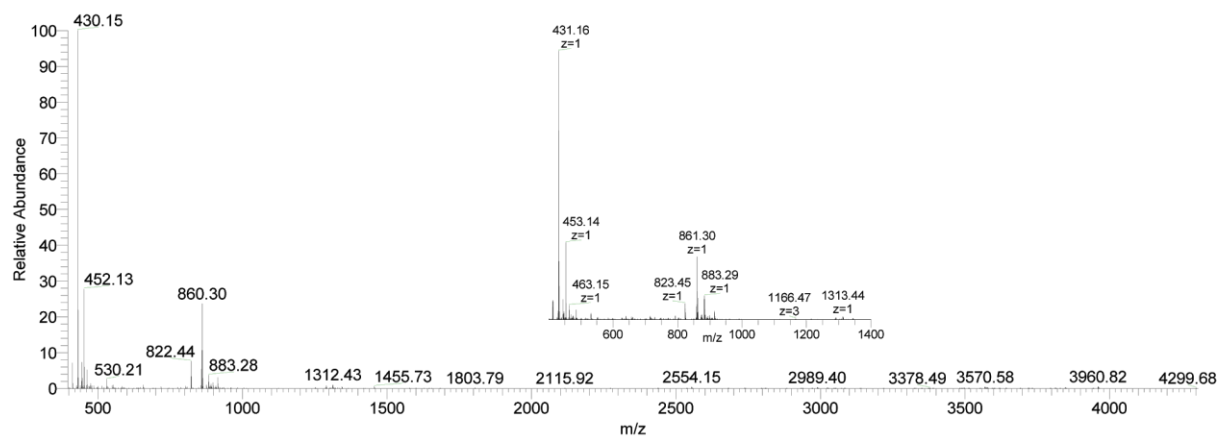

### Peak 3

deconvoluted by Xtract

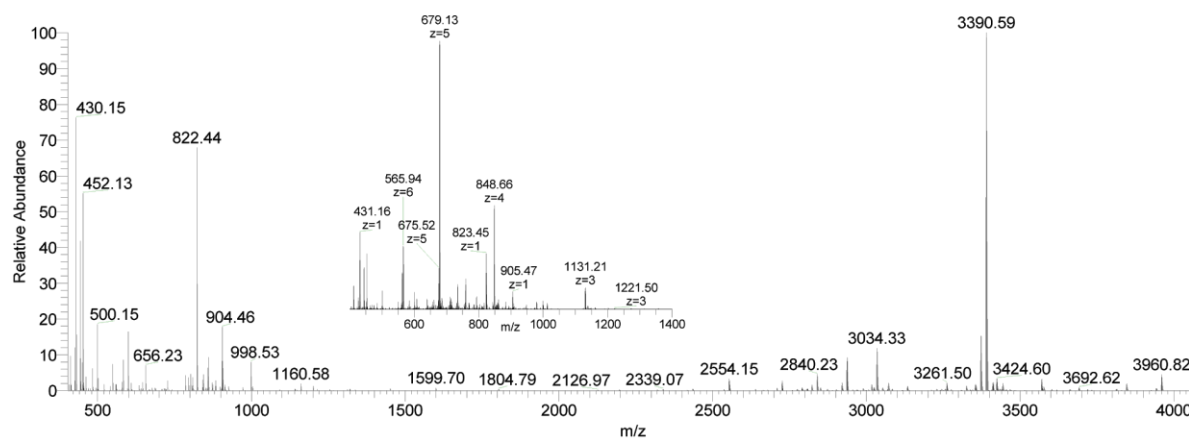

**Supplemental Figure 1. Intact mass spectra of pooled *Vipera kaznakovi* venom.** Peak nomenclature is based on the chromatogram fractions (see **Figure 3**). Mass spectra were either isotopically deconvoluted with Xcalibur or charge deconvoluted with magic transformer (MagTran).

### Peak 4

deconvoluted by Xtract

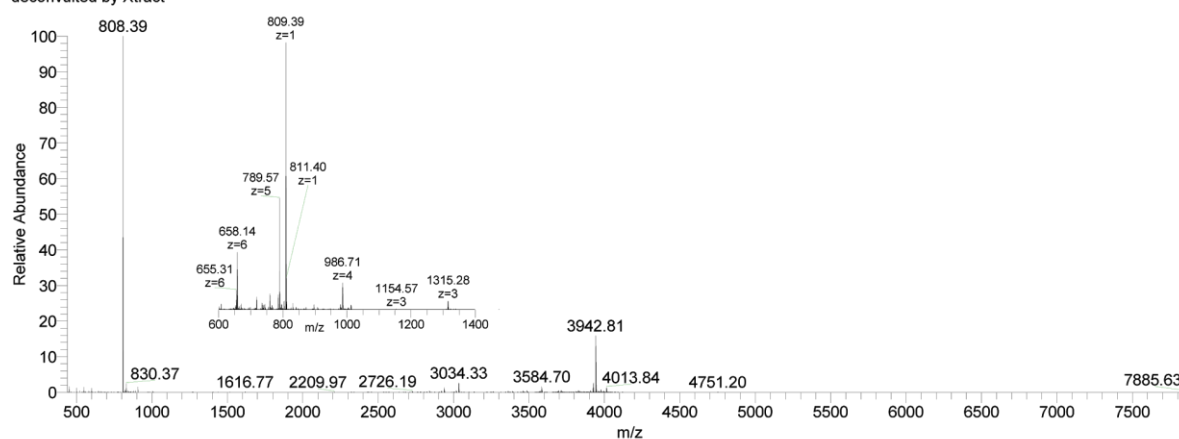

### Peak 5

deconvoluted by Xtract

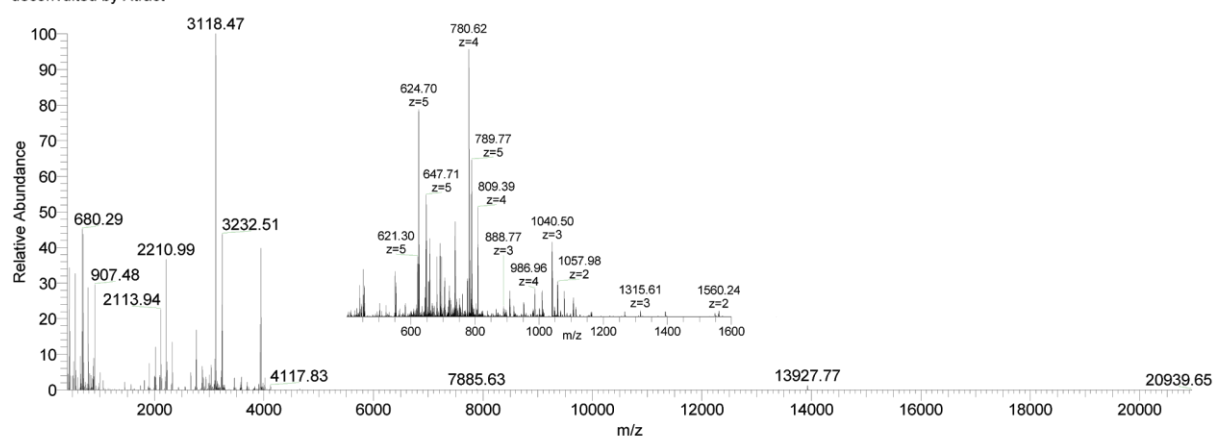

### Peak 6

deconvoluted by Xtract

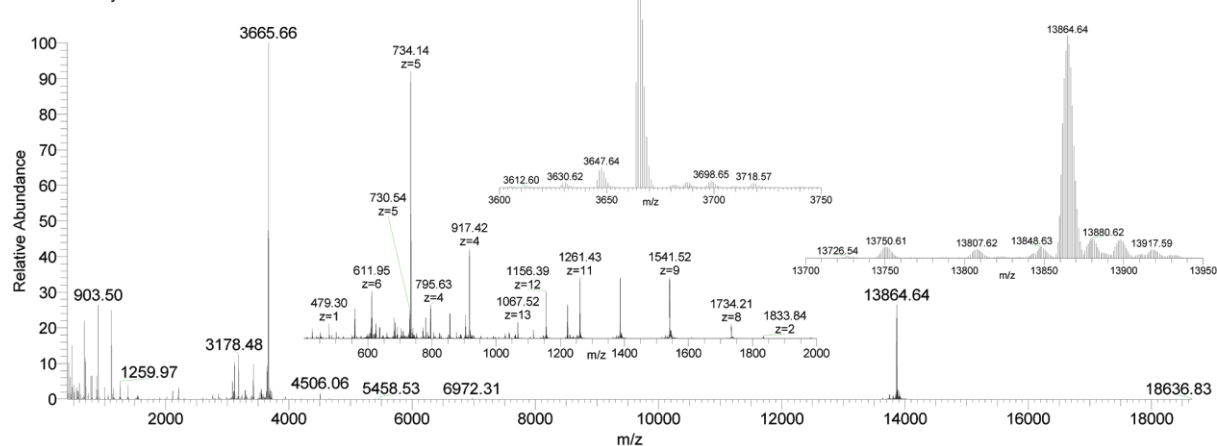

Supplemental Figure 1. continued

**Peak 7**  
deconvoluted by Xtract

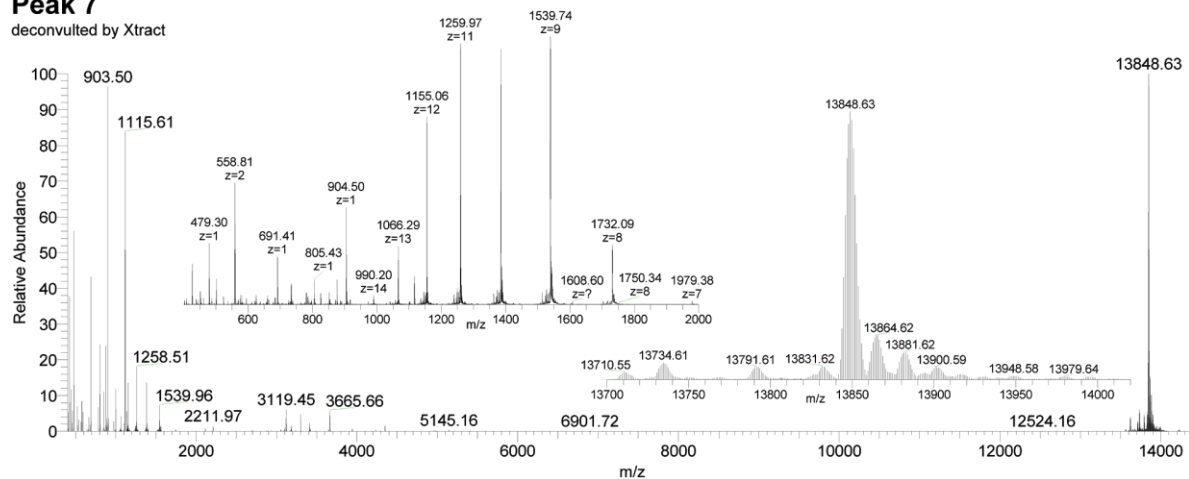

**Peak 8**  
deconvoluted by Xtract

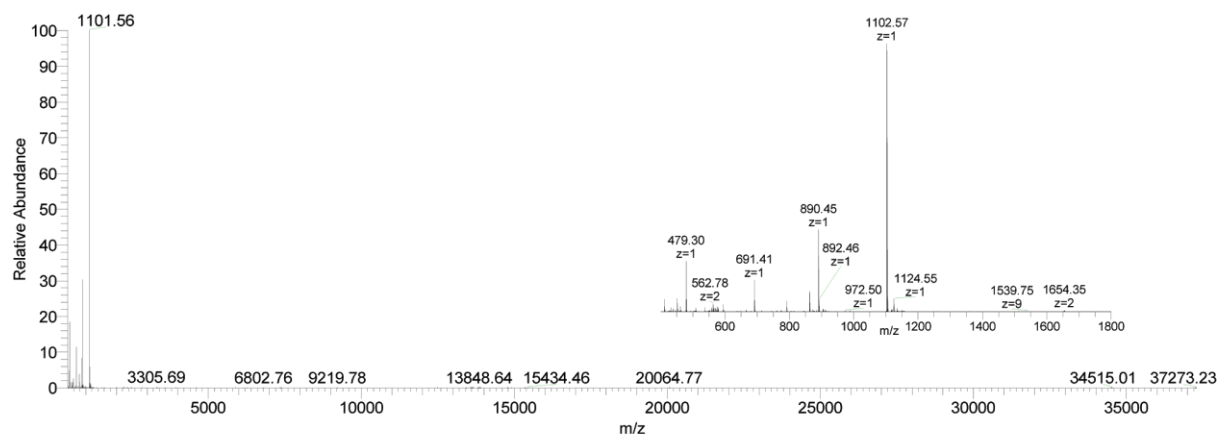

**Peak 9**  
deconvoluted by Xtract

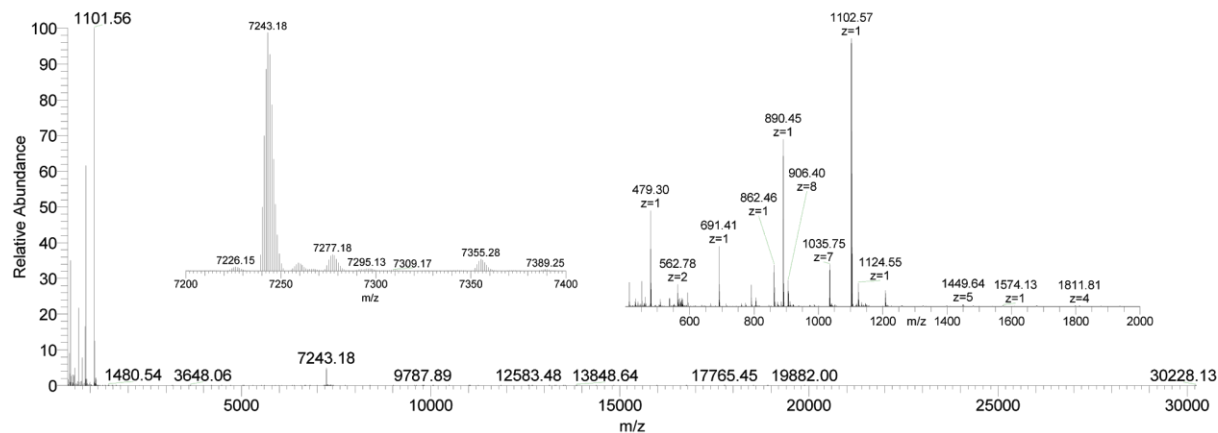

Supplemental Figure 1. continued

### Peak 10

deconvoluted by Xtract

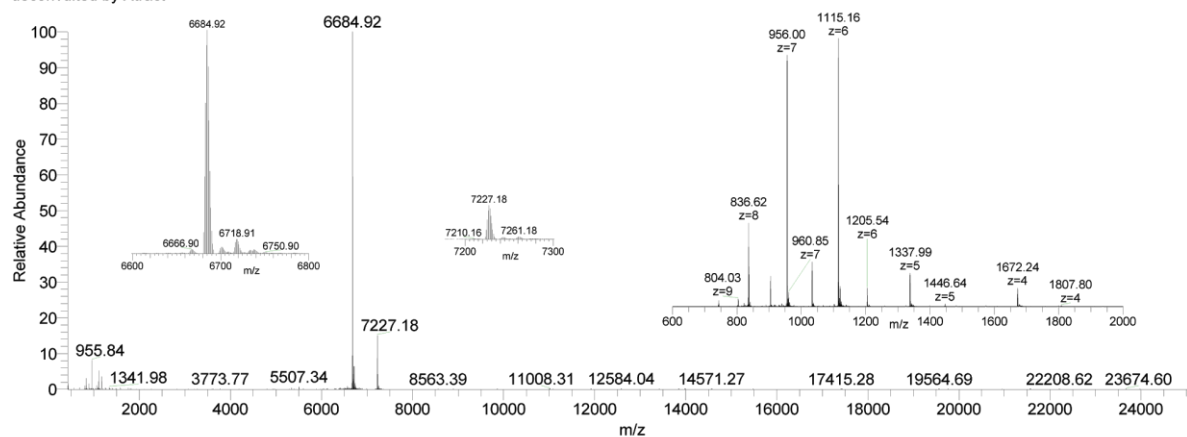

### Peak 11/12

deconvoluted by Xtract

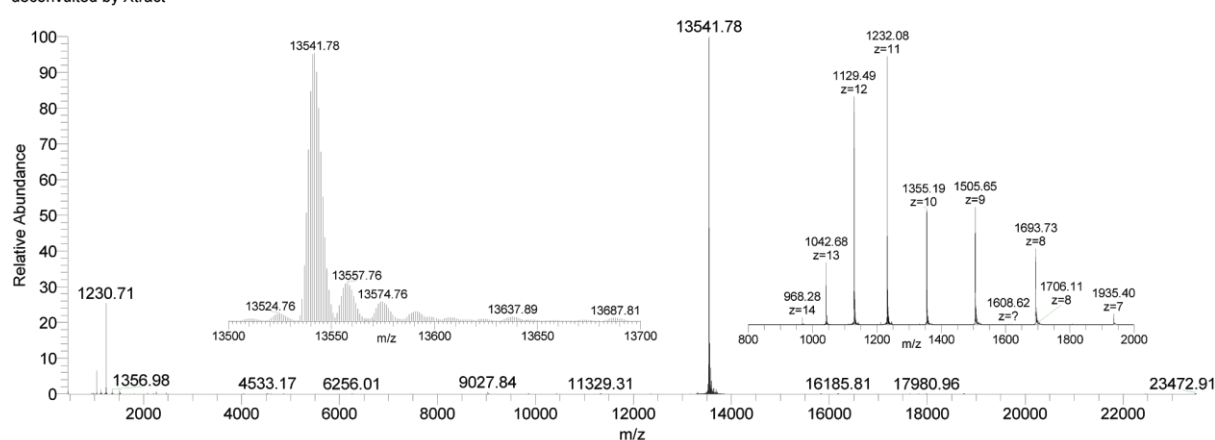

### Peak 13

deconvoluted by Xtract

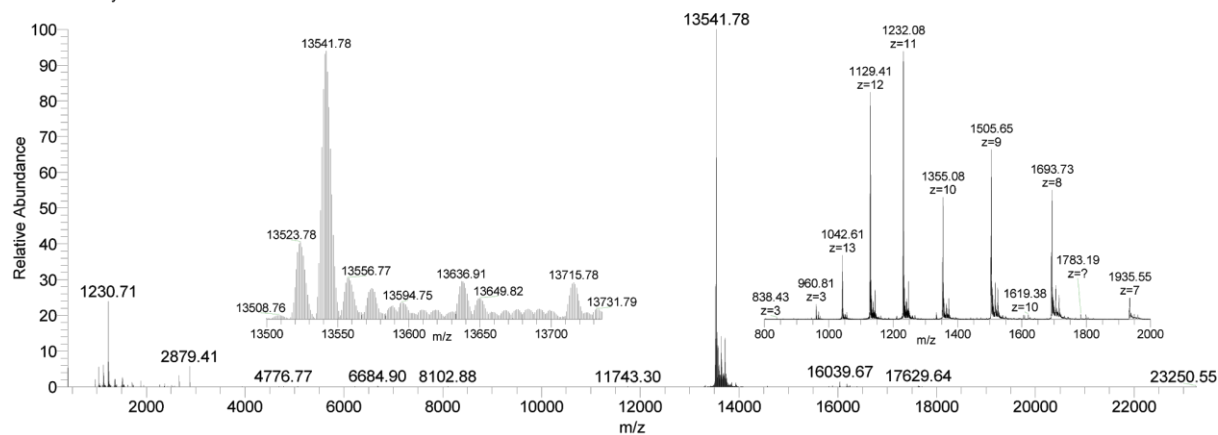

Supplemental Figure 1. continued

**Peak 14**  
deconvoluted by Xtract

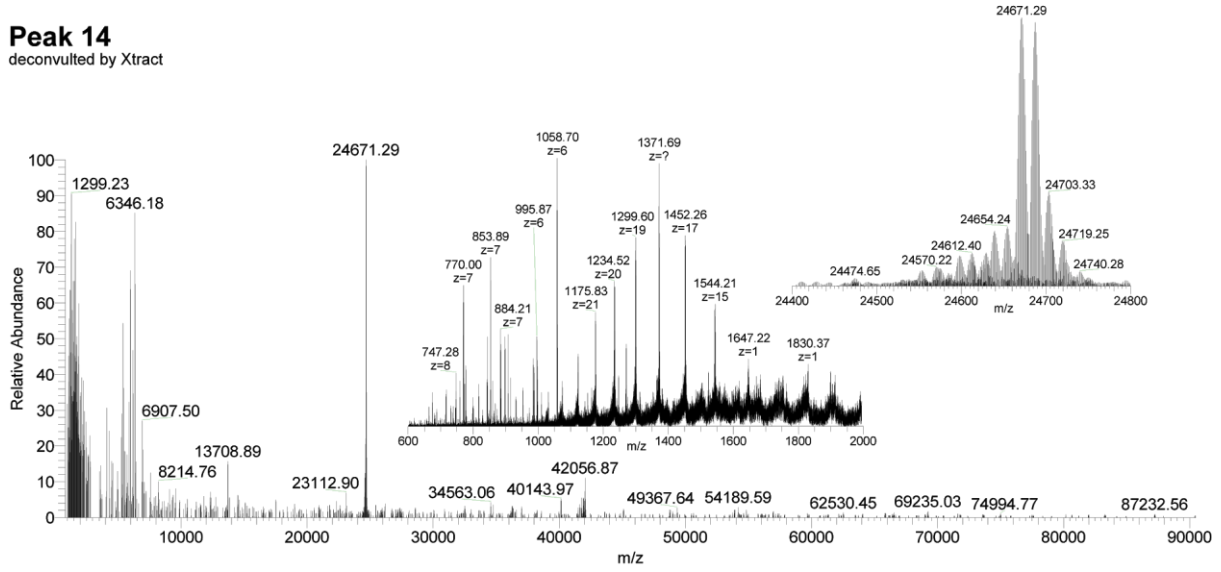

**Peak 15**  
deconvoluted by Xtract

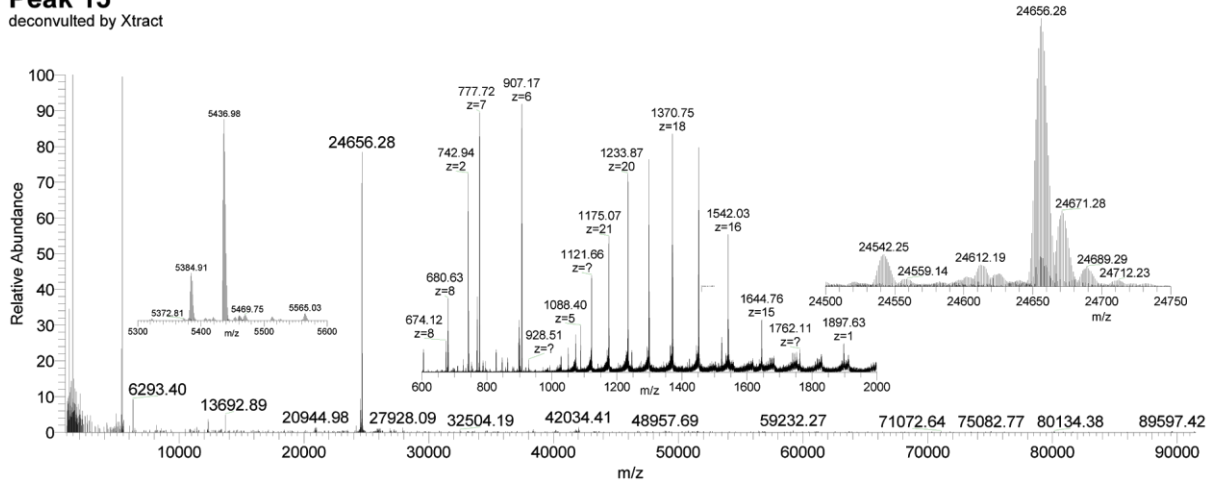

**Peak 16**  
deconvoluted by Xtract

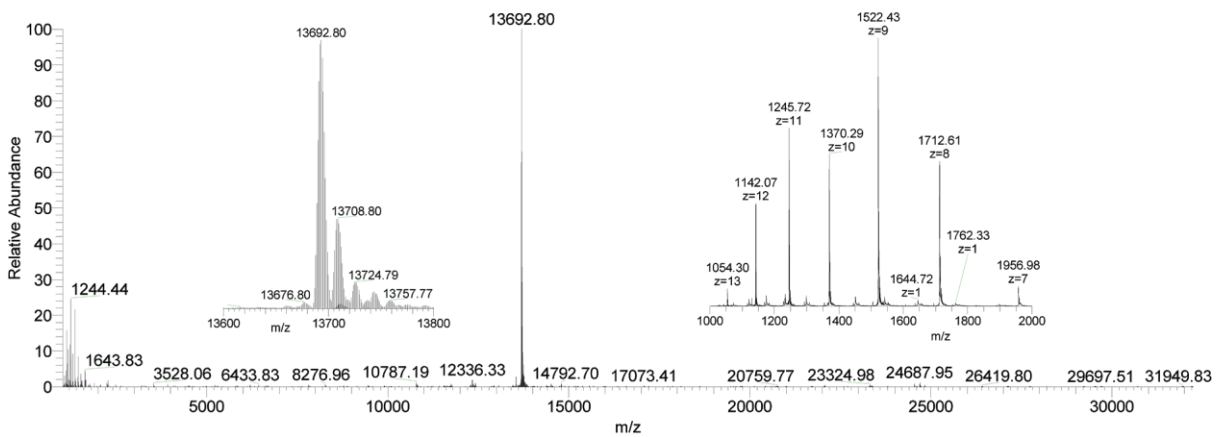

Supplemental Figure 1. continued

**Peak 17**  
deconvoluted by Xtract

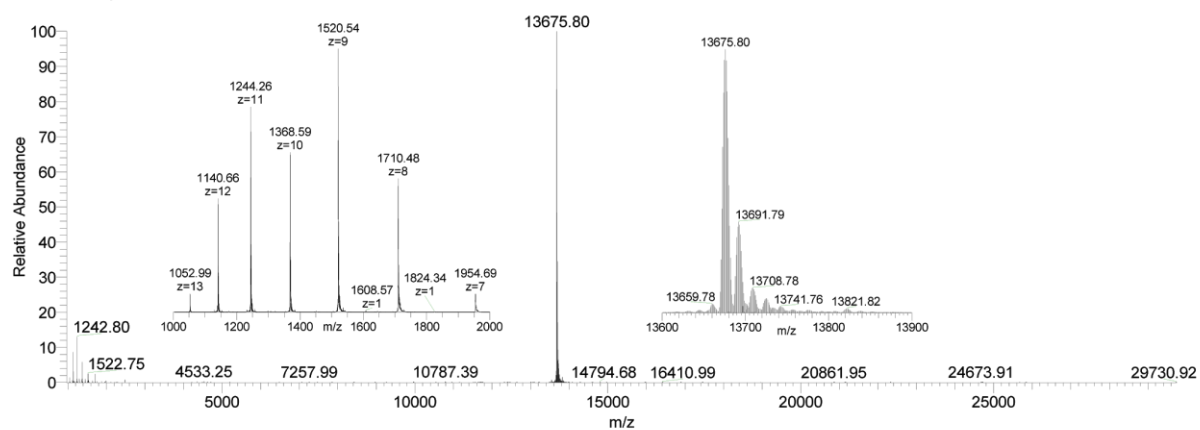

**Peak 18**  
deconvoluted by MagTran

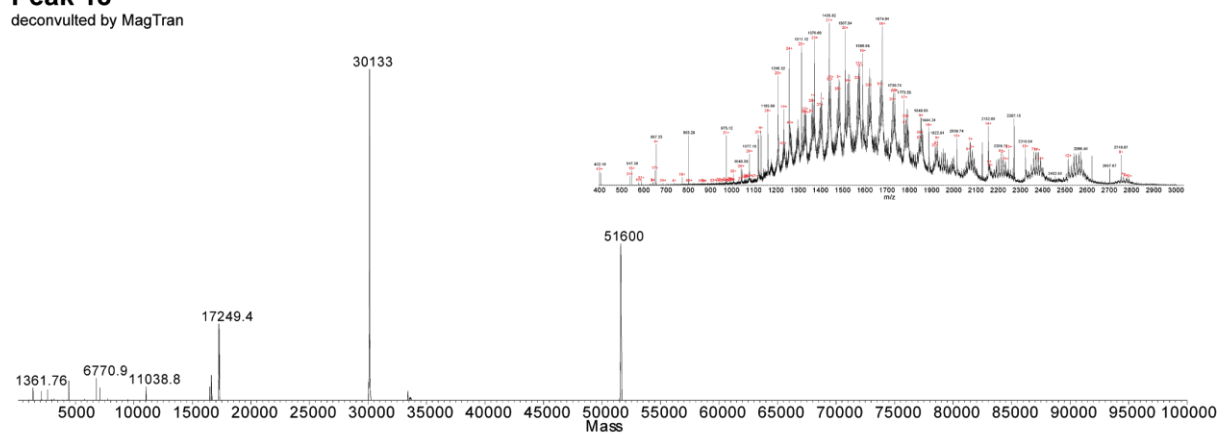

**Peak 19**  
deconvoluted by MagTran

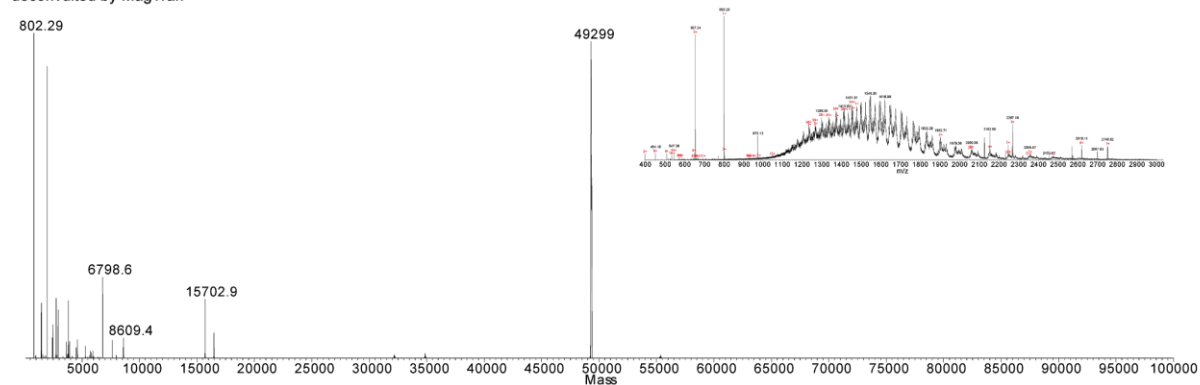

Supplemental Figure 1. continued

### Peak 20

deconvoluted by MagTran

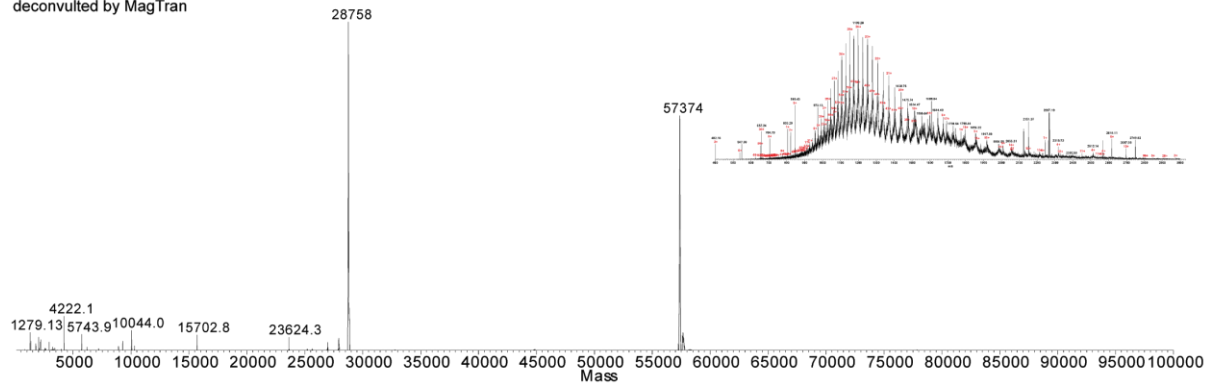

### Peak 21

deconvoluted by MagTran

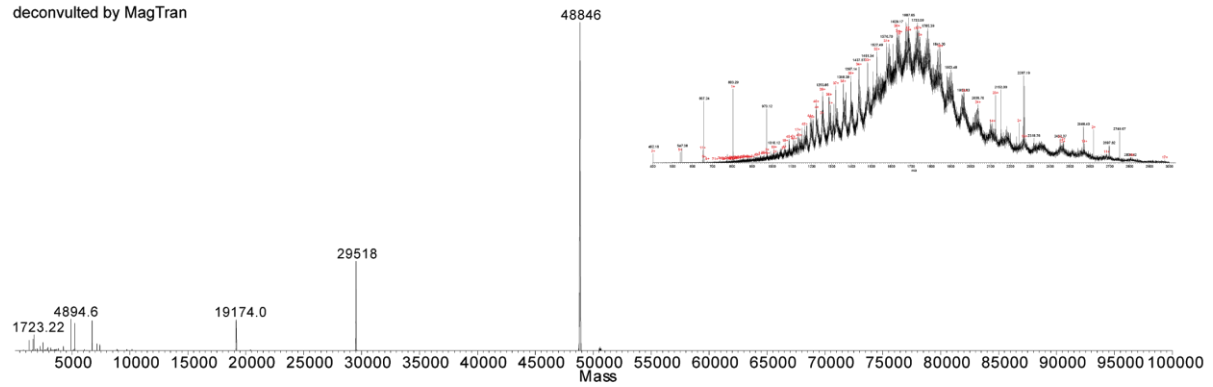

### Peak 22

deconvoluted by MagTran

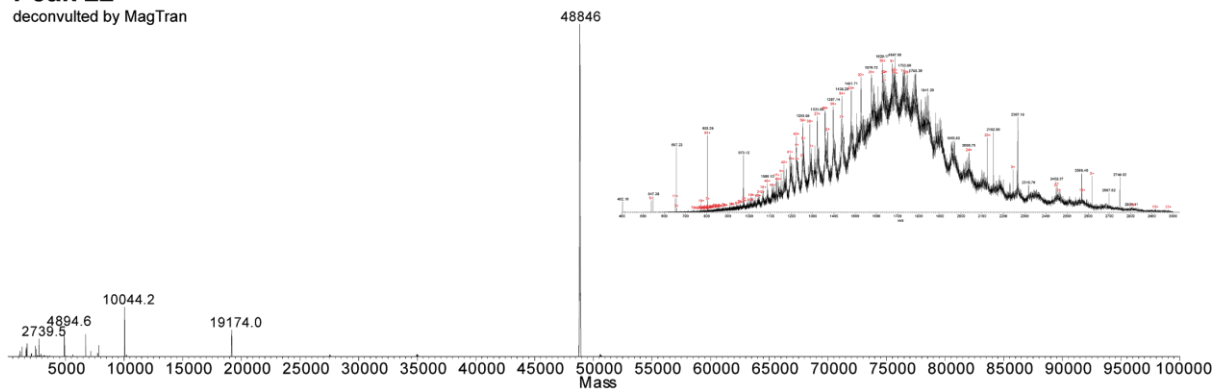

Supplemental Figure 1. continued



### Peak 23

deconvoluted by MagTran

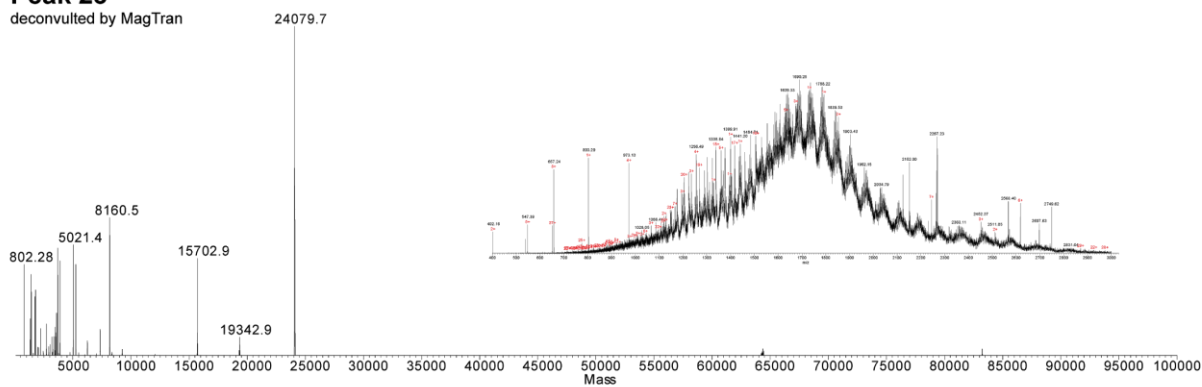

### Peak 24

deconvoluted by MagTran

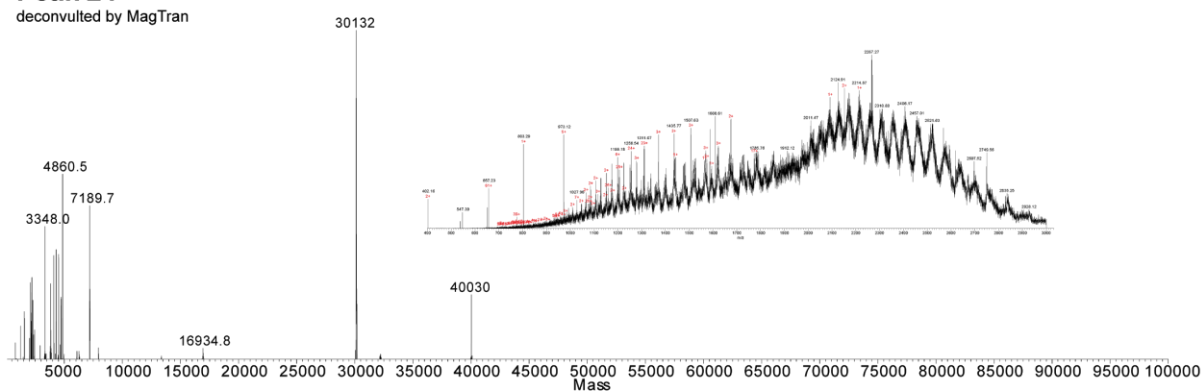

### Peak 25

deconvoluted by MagTran

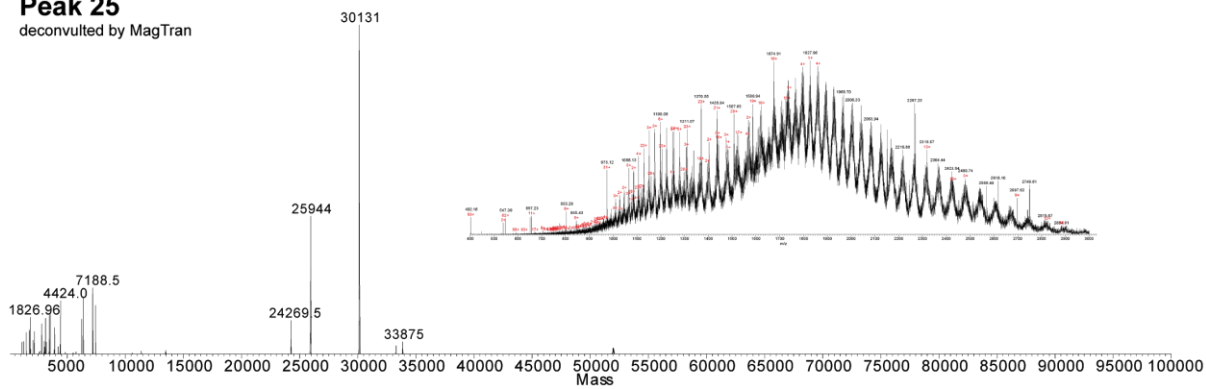

Supplemental Figure 1. continued

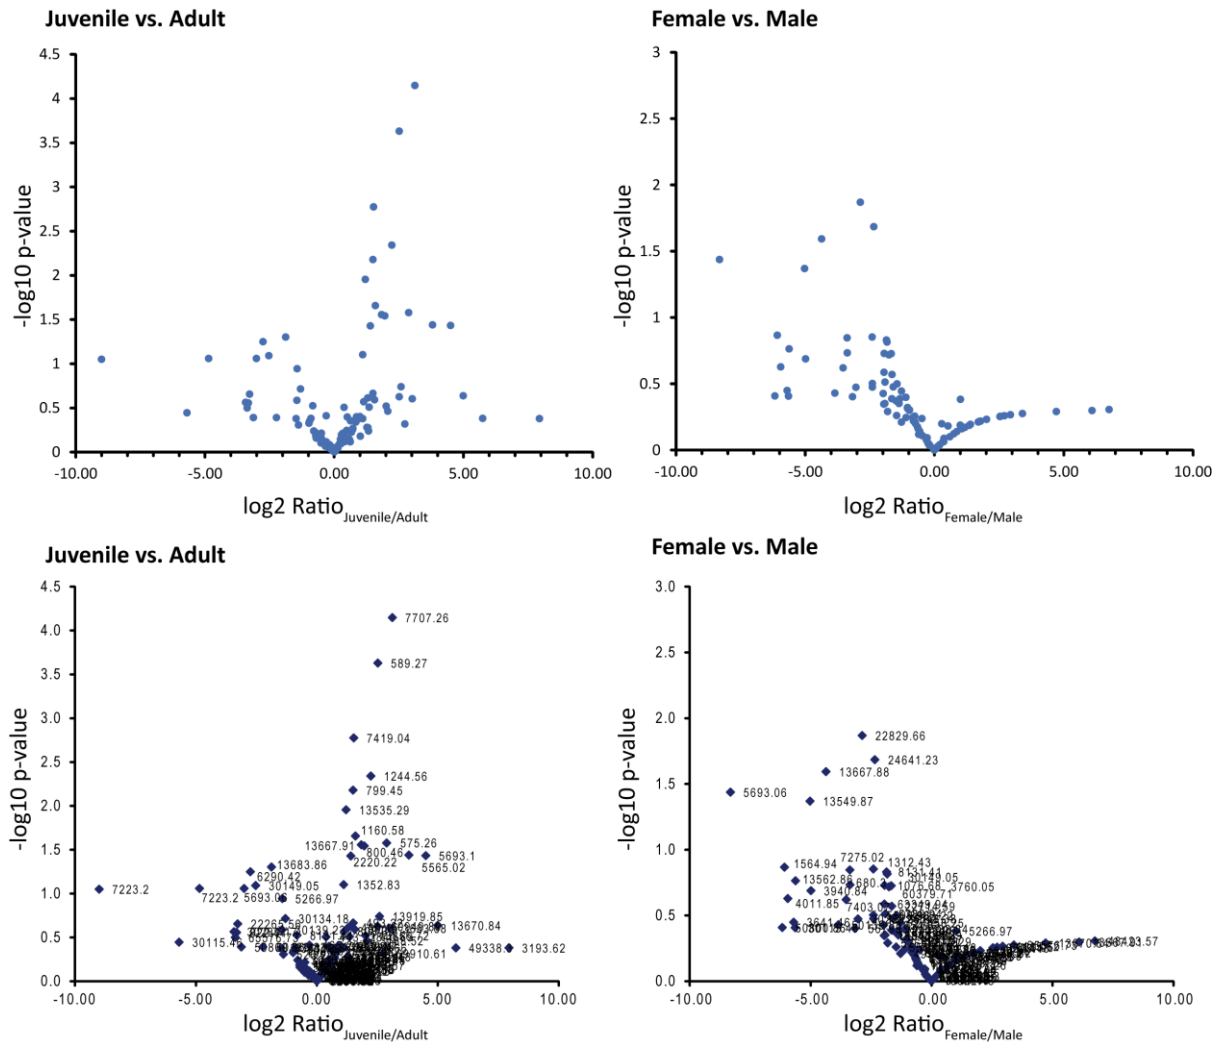

**Supplemental Figure 2.** Volcano plots of female vs. male individuals and juvenile vs. adult animals. The fold change of proteoform abundance ( $\log_2$  Ratio) vs. statistical significance ( $-\log_{10}$  p-value) is shown.  $\log_2$  ratios  $> 2$  or  $< -2$  with  $-\log_{10}$  p-values  $> 1.3$  (p-value  $< 0.05$ ) were considered as significantly differentially expressed proteins.

**Supplemental Table 1. Acute LD50 value of *V. kaznakovi* crude venom.** Determination of LD50 value of *V. kaznakovi* crude venom in mice following 24h exposure by intraperitoneal injection.

| <b>Crude venom concentration [mg/kg] (n=5)</b> | <b>Dead</b> | <b>Live</b> | <b>Viability rate [%]</b> | <b>Determined LD<sub>50</sub> value [mg/kg]</b> |
|------------------------------------------------|-------------|-------------|---------------------------|-------------------------------------------------|
| 5                                              | 5           | 0           | 0                         | <b>2.6<br/>(2.1-3.4)</b>                        |
| 2                                              | 1           | 4           | 80                        |                                                 |
| 1                                              | 0           | 5           | 100                       |                                                 |
